# Supplementary material for: [ 68 Ga]Ga-THP-tetrazine for bioorthogonal click radiolabelling: pretargeted PET imaging of liposomal nanomedicines
Source: Royal Society of Chemistry journal article supplement (doi:10.1039/d4cb00039k), 2024-01-01
Supplement: d4cb00039k1.pdf [file d4cb00039k1.pdf]

Supporting information for:

**[<sup>68</sup>Ga]Ga-THP-Tetrazine for bioorthogonal click  
radiolabelling: Pretargeted PET imaging of liposomal  
nanomedicines**

Aishwarya Mishra<sup>1</sup>, Amaia Carrascal-Miniño<sup>1</sup>, Jana Kim<sup>1</sup>,

Rafael T.M. de Rosales<sup>1</sup>

<sup>1</sup>School of Biomedical Engineering & Imaging Sciences, King's College London,  
St Thomas' Hospital, London, SE1 7EH, UK

## Table of contents

### Contents

|                                                                                   |    |
|-----------------------------------------------------------------------------------|----|
| Section 1 Synthesis and Characterisation of THP-tetrazine.....                    | 2  |
| Section 2 Synthesis and characterisation of TCO-phospholipid .....                | 4  |
| Section 3 Characterisation of TCO-PEG-liposomes .....                             | 7  |
| 1. Nanoparticle Tracking Analysis.....                                            | 7  |
| 2. Cryo-Electron Microscopy.....                                                  | 7  |
| Section 4 Purification methods .....                                              | 7  |
| Section 5 <sup>68</sup> Ga purification .....                                     | 10 |
| Section 6 Log P and Log D <sub>7,4</sub> measurement .....                        | 11 |
| Section 7 Serum stability method .....                                            | 11 |
| Section 8 PET/SPECT imaging reconstruction method .....                           | 12 |
| Section 9 <i>In vivo</i> pretargeted imaging at t = 4 hr time point.....          | 12 |
| Section 10 <i>In vivo</i> biodistribution data .....                              | 13 |
| Section 11 Zeta potential measurement of <sup>67</sup> Ga-TCO-PEG-liposomes ..... | 15 |

### Section 1. Synthesis and Characterisation of THP-tetrazine

To remove unreacted THP-Bz-SCN and excess reaction components (*i.e.*, DIPEA, DMSO), semi-prep HPLC (method 2) on a reverse phase column was utilised to provide the pure THP-tetrazine. The reaction was monitored by LCMS showing that the THP-tetrazine is collected in the fraction where the mobile phase is approximately between 40-50% acetonitrile/water. Using the information obtained from LCMS, we estimated that for HPLC purification, acetonitrile concentration higher than 25 % will be required to elute the THP-tetrazine product. Therefore, a slow gradient as shown in HPLC method 2 was applied with a semi-automated system. The THP-tetrazine was collected at  $t_r = 29$  minutes whereas unreacted tetrazine was collected at  $t_r = 17$  minutes as shown in figure S2(A). The purity of collected THP-tetrazine was verified using LCMS of the collected fractions showing THP-tetrazine ( $m/z$   $[M + 2H]^{2+} = 581.52$ ) and ( $m/z$   $[M+H]^+ = 1162.5$ ) (figure S2(C)).

The isolated pure product was obtained in average yield ( $57 \pm 5$  %) as a bright pink hygroscopic solid and stored for later use at  $-20^\circ\text{C}$ . Further characterisation and confirmation of the purity of the synthesised THP-tetrazine was obtained from <sup>1</sup>NMR spectrum in a mixture of CD<sub>3</sub>CN/D<sub>2</sub>O. The

characteristic peaks of the THP-tetrazine observed were  $\delta$  8.43-8.41 (d, ( $J$  = 8.3 Hz), 2H Ar-H from tetrazine), 7.57 (d, ( $J$  = 8.2 Hz), 2H) 7.25-7.36 (4H from N-H), 6.96 (m, 6H from Ar-H from tetrazine), 4.89(s, 3H from Ar-H from THP), 4.54 (s, 2H), 3.79-3.82 (m, 9H from CH<sub>3</sub>-N, 8H from CH<sub>2</sub>-N), 3.01 (s, 2H) 2.48 (s, 3H), 2.42-2.44 (m, 2H ), 2.11-2.15 (m, 4H), 1.95 (m, 9H), 1.85 (s, 2H), 1.25 (m, 4H). (Figure S1) <sup>1</sup>H NMR (400 MHz, CD<sub>3</sub>CN).

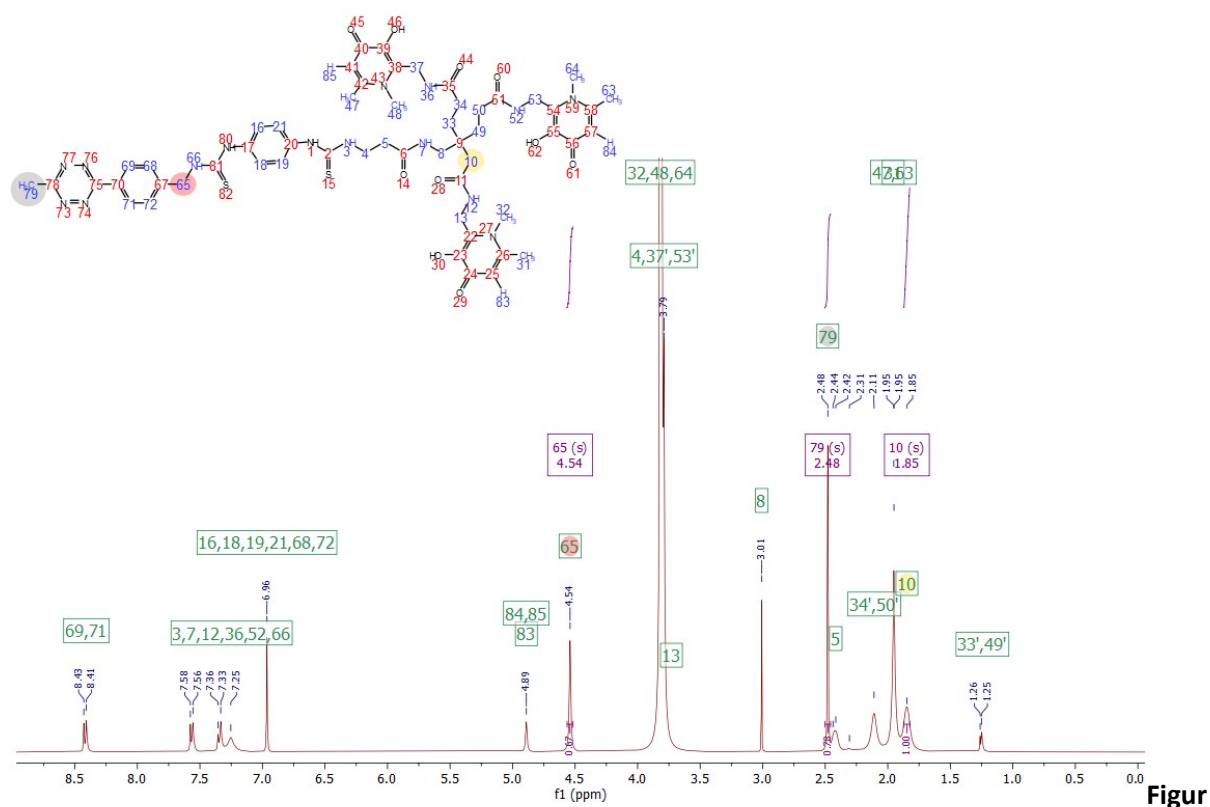

**e S1.** NMR spectra of the THP-tetrazine: The synthesised THP-tetrazine was characterised by the presence of the above peaks. The spectrum was recorded in CD<sub>3</sub>CN/D<sub>2</sub>O due to low solubility in CDCl<sub>3</sub>. <sup>1</sup>H NMR (400 MHz)  $\delta$  8.43-8.41 (d, ( $J$  = 8.3 Hz), 2H Ar-H from tetrazine), 7.57 (d, ( $J$  = 8.2 Hz), 2H) 7.25-7.36 (4H from N-H), 6.96 (m, 6H from Ar-H from tetrazine), 4.89(s, 3H from Ar-H from THP), 4.54 (s, 2H), 3.79-3.82 (m, 9H from CH<sub>3</sub>-N, 8H from CH<sub>2</sub>-N), 3.01 (s, 2H) 2.48 (s, 3H), 2.42-2.44 (m, 2H ), 2.11-2.15 (m, 4H), 1.95 (m, 9H), 1.85 (s, 2H), 1.25 (m, 4H). Non-deuterated solvent H<sub>2</sub>O and CD<sub>3</sub>CN impurity peaks are also observed in the spectrum.

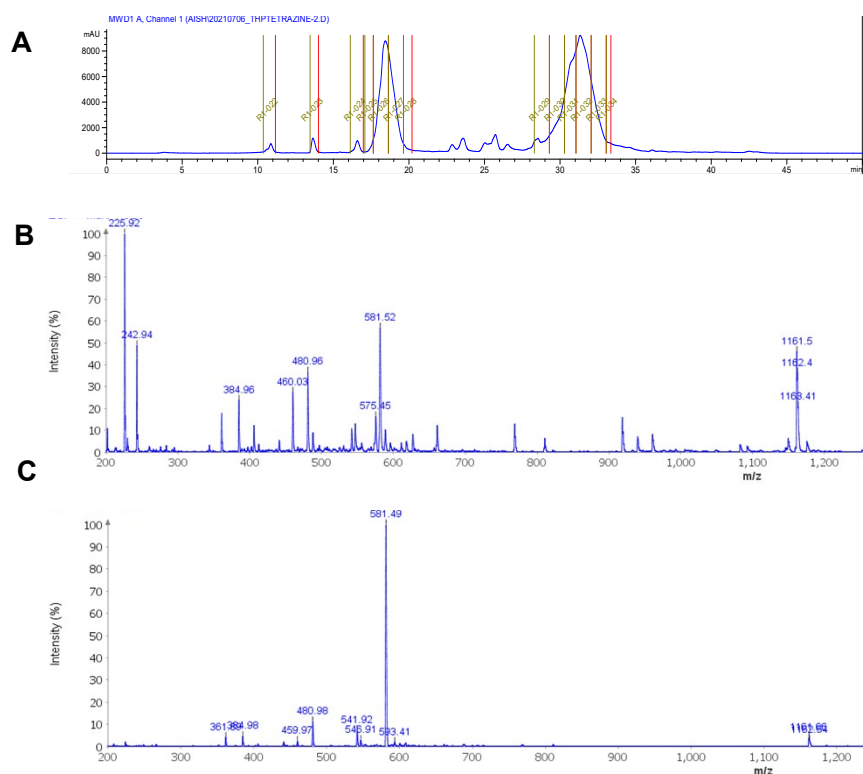

**Figure S2.** Purification of THP-tetrazine: (A) HPLC chromatogram of the semi-prep HPLC method used for isolation of THP-tetrazine from the reaction mixture. Fraction collected between  $t_r = 29$  min-33 min contained the THP-tetrazine; (B) Mass spectra of the THP-tetrazine crude reaction mixture showing the THP-tetrazine as the major product alongside unreacted Methyl-tetrazine amine and hydrolysed THP; and (C) Mass spectra of the THP-tetrazine fraction collected after semi-prep HPLC showing the pure isolated THP-tetrazine.

## Section 2. Synthesis and characterisation of TCO-phospholipid

TCO-PEG<sub>4</sub>-NHS ester (8.2 mg, 0.0159 mmol) was dissolved in DMSO (1 mL) followed by addition of DSPE-PEG (2000)-amine (15 mg, 0.0053 mmol). DIPEA (20  $\mu$ L) was added to the reaction mixture and incubated at R.T. overnight. TCO-Phospholipid was purified using dialysis, lyophilised, weighed (reaction yield: 96%) and stored at -20°C for further use. <sup>1</sup>H NMR (400 MHz, CDCl<sub>3</sub>)  $\delta$  6.66 (s, 1H), 5.57-5.53 (m, 2H), 5.17-5.14 (m, 1H), 4.67 (s, 1H), 4.23-4.06 (m, 6H), 4.18 (s, 2H), 3.76-3.47 (m, 196H), 3.40-3.37 (s, 2H), 3.28 (s, 2H), 2.69-2.66 (t, 2H), 2.55-2.52 (t, 2H), 2.42 (s, 1H), 2.27-2.21 (m, 4H), 2.10-2.01 (m, 4H), 1.89-1.84 (m, 6H), 1.74 (m, 2H), 1.70 (m, 2H), 1.19 (s, 56H), 0.81 (t, 6H)(Figure S3) . TCO-PL was also characterised by high-resolution mass spectrometry (TCO-PL:  $m/z=2700-3700$  ( $z=1$ ); DSPE-PEG2000 amine  $m/z=2400-3200$  ( $z=1$ )).



### DSPE-PEG2000-NH<sub>2</sub>

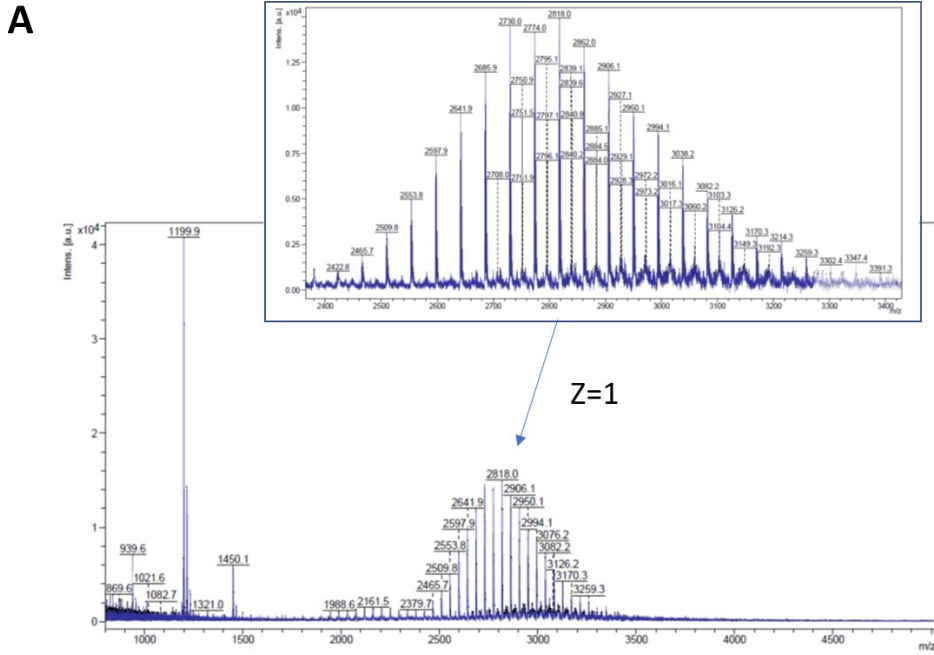

### TCO-PL

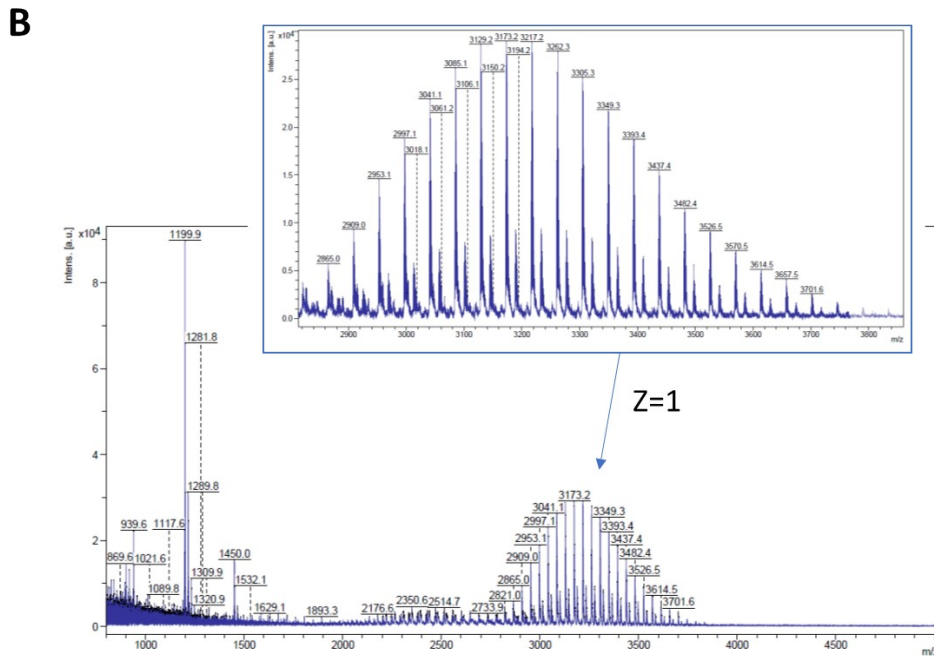

**Figure S4.** The mass spectrum of the TCO-PL (A) and DSPE-PEG2000 amine (B): The envelope nature observed in both spectra is due to the polydispersity of the PEG2000 chain which is characterised by a difference of 44 between each peak within the envelope. The TCO-PL is characterised by the higher  $m/z=2700-3700$  compared to the lower  $m/z$  for DSPE-PEG2000 amine  $m/z=2400-3200$ .

### **Section 3. Characterisation of TCO-PEG-liposomes**

#### **1. Nanoparticle Tracking Analysis**

The concentration and the hydrodynamic of synthesised TCO-PEG-liposomes were measured by NTA using NanoSight LM10 and NTA software v3.2 (Malvern Panalytical). The stock sample was diluted to achieve ~100 particles/viewing frame. Measurements were made in triplicates for 60 s with a 488 nm laser, for up to three serial dilutions of the sample.

#### **2. Cryo-Electron Microscopy**

QUANTIFOIL R 2/2 carbon grids (mesh: Cu 300, #234901; Agar Scientific) were plasma discharged for 50 s at 30 SCCM gas flow in Nanoclean 1070 (Fischione instruments). Aliquots (5  $\mu$ L) of TCO-PL-liposomes or PEGylated liposomes were deposited on the carbon grids in Vitrobot Mark IV (FEI). The excess liquid was removed by blotting with filter paper (Agar Scientific); Parameters: blotting time = 2 s, wait time = 30 s, and blotting force = 2. The grids were instantly frozen in liquid ethane ( $-188$  °C) and maintained in liquid N<sub>2</sub> ( $-196$  °C) in a grid box and transferred into a cryo-transfer holder. CryoEM of these samples was recorded on TECNAI 12 G2 (FEI) system interfaced with a TemCam-F216 camera and operated using Temmenu v4 software (Tietz Video & Image Processing Systems GmbH, Germany). Parameters used to capture images are as follows: electron acceleration = 120 kV, magnification = 52,000 $\times$ , acquisition time = 1 s, and spot size = 5.

### **Section 4 Purification methods**

The following HPLC/FPLC methods were used:

#### **Method 1. Analytical HPLC method for LC/MS for characterisation of THP-tetrazine**

Solvent A= Water (0.1% Trifluoroacetic acid v/v), Solvent B= Acetonitrile (0.1% Trifluoroacetic acid v/v)

| TIME (MIN) | FLOW RATE (ML MIN-1) | % A | % B |
|------------|----------------------|-----|-----|
| 0          | 1                    | 95  | 5   |
| 2          | 1                    | 95  | 5   |
| 11         | 1                    | 5   | 95  |
| 12         | 1                    | 5   | 95  |
| 12.1       | 1                    | 95  | 5   |
| 15         | 1                    | 95  | 5   |

Column: Agilent Eclipse XDB-C18 column (4.6 x 150 mm, 5 µm)

### Method 2. Semi-prep HPLC method for purification of THP-tetrazine

Solvent A= Acetonitrile (0.1% Trifluoroacetic acid v/v), Solvent B= Water (0.1% Trifluoroacetic acid v/v)

| TIME (MIN) | FLOW RATE (ML MIN-1) | % A | % B |
|------------|----------------------|-----|-----|
| 0          | 4                    | 5   | 95  |
| 2          | 4                    | 5   | 95  |
| 52         | 4                    | 50  | 50  |
| 62         | 4                    | 5   | 95  |

Column: Agilent Zorbax XDB C18 (21.2 x 150 mm, 5 µm)

### Method 3. Analytical radioHPLC method for characterisation of [<sup>68</sup>Ga]Ga-THP-tetrazine

Solvent A= Water (0.1% Trifluoroacetic acid v/v), Solvent B= Acetonitrile (0.1% Trifluoroacetic acid v/v)



| Time (min) | Flow rate (mL min <sup>-1</sup> ) | % A | % B |
|------------|-----------------------------------|-----|-----|
| 0          | 1                                 | 95  | 5   |
| 2          | 1                                 | 95  | 5   |
| 11         | 1                                 | 5   | 95  |
| 12         | 1                                 | 5   | 95  |
| 12.1       | 1                                 | 95  | 5   |
| 15         | 1                                 | 95  | 5   |

Column: Agilent Eclipse XDB-C18 column (4.6 x 150 mm, 5 μm)

#### Method 4. Serum stability HPLC method

Solvent A = phosphate buffered saline

| Time (min) | Flow rate (ml min <sup>-1</sup> ) | Solvent A (%) |
|------------|-----------------------------------|---------------|
| 0          | 1                                 | 100           |
| 40         | 1                                 | 100           |

Column: Phenomenex BioSep SEC-s2000 column (300 x 7.8 mm, 5 μm)

#### Method 5. Size exclusion purification method

A G-25 size exclusion column pre-equilibrated with 15 column volumes of 0.9% filtered saline was used. The test sample for purification is applied to the column in 500 μL volume, followed by 750 μL fractions which are collected in separate vials. Liposomes elute in the first 750 μL fraction as seen in figure below.

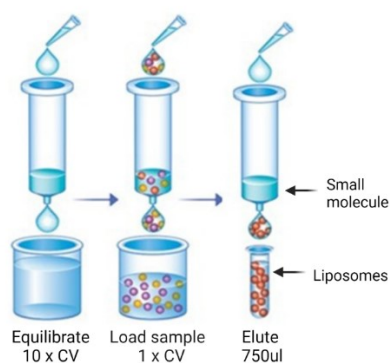

**Figure S5.** Procedure for purification of liposomes using size exclusion chromatography column.  
Created with BioRender.com.

## Section 5. $^{68}\text{Ga}$ purification

All radioactive work was performed manually with all necessary radioprotection measures in place.  $^{68}\text{Ga}$  was manually eluted from  $^{68}\text{Ge}/^{68}\text{Ga}$  generator with 0.1 N HCl. The peak radioactivity containing 1 mL elution was used for radiolabelling after buffering with 3.4 M Sodium acetate/1 M Sodium carbonate to pH 6. Buffered  $^{68}\text{Ga}$  was used for all radiolabelling and i.v. injections after removal of colloids using saline pre-rinsed centrifugal filter MW cutoff 50 kDa.

The colloid formation during neutralisation of generator eluate competes with the radiolabelling of the chelator and provides an impure final reaction mixture requiring a need for purification of the radiolabelling mixture post labelling. To minimise the presence of colloids, post buffering of generator eluate to pH 6, buffered Ga was purified using a centrifugal spin filter which removed any colloids formed. This was verified using radioTLC as seen in figure S6.

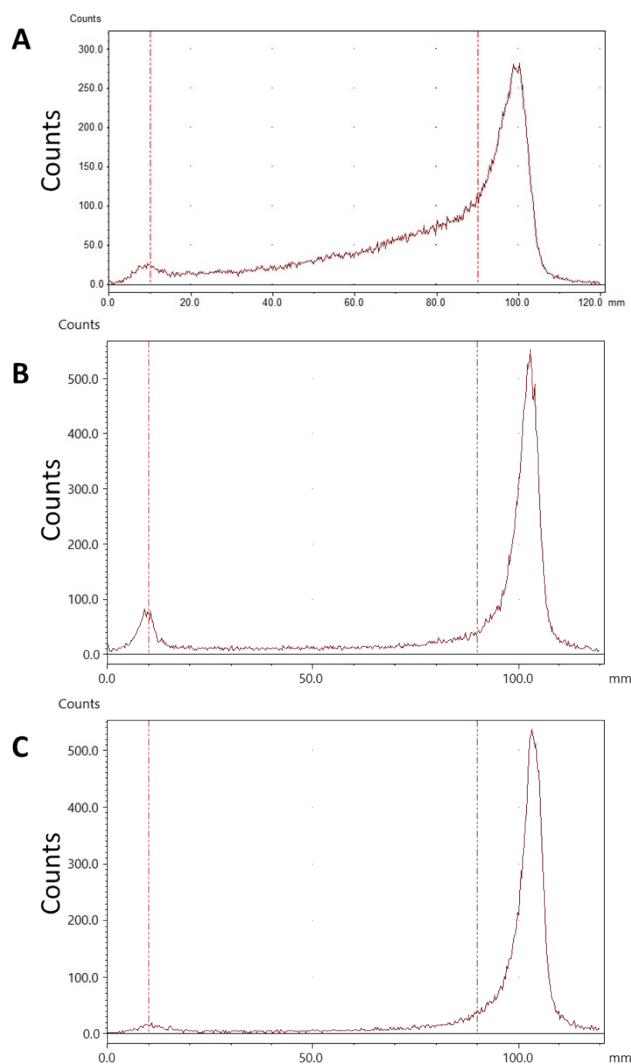

**Figure S6.** Purification of  $^{68}\text{Ga}$ : The colloids generated after neutralisation of gallium generator eluate are removed and the different gallium samples pre and post purification are characterised using ITLC **(A)** Generator eluate; **(B)** Neutralised  $^{68}\text{Ga}$  pre-purification and **(C)** Neutralised  $^{68}\text{Ga}$  post-purification

### Section 6 Log P and Log $D_{7.4}$ measurement

For log P measurement, [ $^{68}\text{Ga}$ ]Ga-THP-Tz (50  $\mu\text{L}$ , 1 MBq) were added to vials containing a mixture of water saturated octanol (500  $\mu\text{L}$ ) and octanol saturated water (500  $\mu\text{L}$ ). The tubes were shaken for 3 min and the mixture was centrifuged for 5 min to separate the octanol and water phases. Aliquots (50  $\mu\text{L}$ ) of each phase were taken and transferred to separate vials for counting of radioactivity. For log  $D_{7.4}$  measurement, the same procedure was performed by replacing water with PBS. All experiments were performed in triplicates.

## Section 7. [<sup>68</sup>Ga]Ga-THP-tetrazine serum stability method

The stability of [<sup>68</sup>Ga]Ga-THP-tetrazine was evaluated at 37°C in commercially obtained human serum for up to 3 hours using HPLC SEC which separated THP-tetrazine and serum components. The serum protein bound <sup>68</sup>Ga eluted at t<sub>r</sub> = 9 min whereas [<sup>68</sup>Ga]Ga-THP-tetrazine eluted at t<sub>r</sub> = 20 min when the serum incubated samples were analysed using serum stability HPLC method 4. The analysis of serum incubated samples showed minimal transchelation of <sup>68</sup>Ga to blood serum proteins and high stability of >95 % after 3 hours of incubation as shown in figure S7.

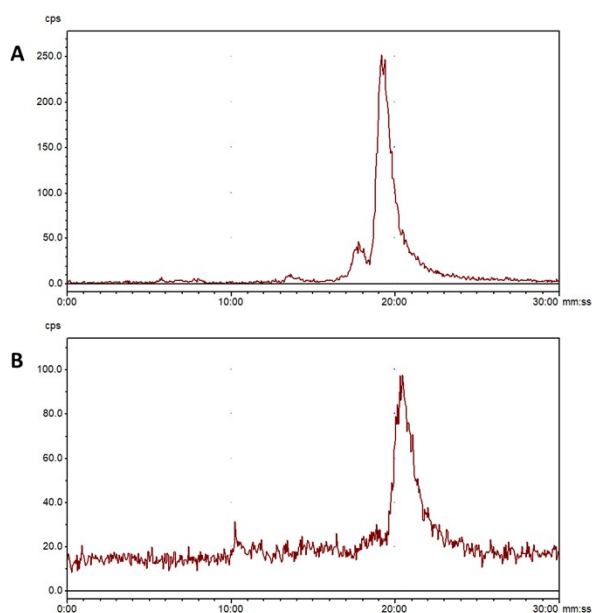

**Figure S7.** Serum stability assessment of [<sup>68</sup>Ga]Ga-THP-tetrazine using HPLC SEC method 4: (A) RadioHPLC chromatogram of serum incubated [<sup>68</sup>Ga]Ga-THP-tetrazine at t = 15 minutes; (B) RadioHPLC chromatogram of serum incubated [<sup>68</sup>Ga]Ga-THP-tetrazine at t = 3 hours; RadioHPLC chromatogram species: serum bound <sup>68</sup>Ga (t<sub>r</sub> = 10 min), [<sup>68</sup>Ga]Ga-THP-tetrazine (t<sub>r</sub> = 20 min).

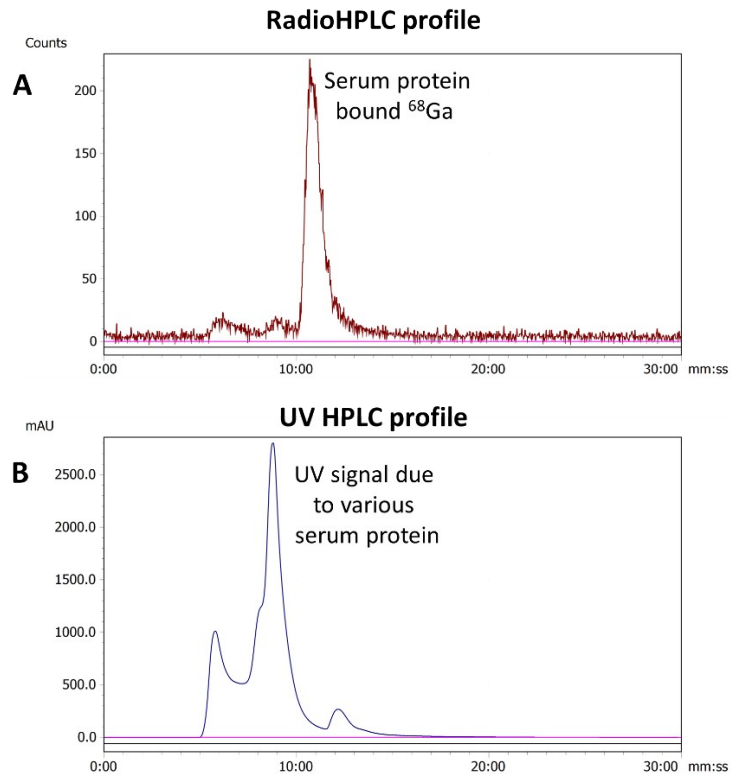

**Figure S8.** HPLC SEC control serum stability run: (A) RadioHPLC chromatogram showing the elution of serum bound  $^{68}\text{Ga}$ ; (B) UV chromatogram (280 nm) of proteins present in human serum.

## Section 8. PET/SPECT imaging reconstruction method

PET/CT images were reconstructed using Tera-Tomo 3D reconstruction (400–600 keV energy window, 1–3 coincidence mode, 4 iterations and subsets) at a voxel size of  $(0.4 \times 0.4 \times 0.4)$  mm<sup>3</sup> and corrected for attenuation, scatter, and decay. The data were binned into 17 frames ( $1 \times 1$ ,  $10 \times 3$ ,  $5 \times 5$  and  $1 \times 4$  min) for dynamic analysis. SPECT images were reconstructed using HiSPECT standard method.



**Table S1.** Biodistribution data from the TCO-PL-liposomes pretargeting experiment on healthy animals

|                 | <sup>[68 Ga]</sup> Ga-THP-tetrazine (Negative control) |              |   | Pretargeting group-24 h |              |   | <sup>[67 Ga]</sup> Ga-TCO-liposomes (Positive control)- 24 h |              |   |
|-----------------|--------------------------------------------------------|--------------|---|-------------------------|--------------|---|--------------------------------------------------------------|--------------|---|
|                 | Mean                                                   | Standard dev | n | Mean                    | Standard dev | n | Mean                                                         | Standard dev | n |
| Blood           | 5.626807911                                            | 2.45921956   | 4 | 4.674034751             | 1.43091048   | 4 | 16.98061324                                                  | 2.757014718  | 4 |
| Heart           | 2.534111445                                            | 1.310687271  | 4 | 2.020845332             | 0.651391938  | 4 | 4.334614519                                                  | 0.388103858  | 4 |
| Lungs           | 28.03630434                                            | 7.66594347   | 4 | 18.12860383             | 14.70351432  | 4 | 5.780277022                                                  | 0.8651312    | 4 |
| Stomach         | 0.970225656                                            | 0.503065361  | 4 | 0.65832653              | 0.115264928  | 4 | 1.066092208                                                  | 0.352535389  | 4 |
| Pancreas        | 0.885373628                                            | 0.473348616  | 4 | 3.391809463             | 4.041000404  | 4 | 1.75344565                                                   | 0.520053016  | 4 |
| Spleen          | 11.87526429                                            | 6.027187305  | 4 | 32.82954566             | 16.3309688   | 4 | 48.8433591                                                   | 2.629610051  | 4 |
| Small intestine | 21.30868063                                            | 6.874148889  | 4 | 11.8192986              | 5.424517069  | 4 | 2.220519374                                                  | 0.184252849  | 4 |
| Large intestine | 2.033573358                                            | 1.585917596  | 4 | 3.411370967             | 3.577939566  | 4 | 1.298217835                                                  | 0.084173876  | 4 |
| Liver           | 22.37020567                                            | 11.44575327  | 4 | 31.30443392             | 21.54211264  | 4 | 44.45899745                                                  | 4.784803357  | 4 |
| Bone            | 1.327226797                                            | 0.465553275  | 4 | 2.676462914             | 1.569143175  | 4 | 3.489126499                                                  | 2.145516357  | 4 |
| Muscle          | 0.62218617                                             | 0.296595309  | 4 | 0.665588529             | 0.091346205  | 4 | 0.525962398                                                  | 0.102649409  | 4 |
| Skin and Fur    | 3.858789788                                            | 1.851406863  | 4 | 2.934304287             | 0.483974034  | 4 | 1.414591504                                                  | 0.218278802  | 4 |
| Tail            | 3.58191388                                             | 1.965527666  | 4 | 3.195798508             | 0.779530681  | 4 | 1.625103345                                                  | 0.746248968  | 4 |
| Brain           | 0.268754083                                            | 0.125391133  | 4 | 0.171779431             | 0.042736477  | 4 | 0.986483798                                                  | 0.266561575  | 4 |
| Kidney          | 6.752648032                                            | 5.079592266  | 4 | 4.886517577             | 0.730655011  | 4 | 5.831151214                                                  | 0.749681987  | 4 |

**Table S2.** Biodistribution data from the TCO-PL-liposomes pretargeting experiment on tumour animals

|                  | <sup>[67 Ga]</sup> Ga-TCO-liposomes-48 h (Positive control) |              |   | <sup>[68 Ga]</sup> Ga-THP-tetrazine (Negative control) |              |   | Pretargeting group- 24 h |              |   |
|------------------|-------------------------------------------------------------|--------------|---|--------------------------------------------------------|--------------|---|--------------------------|--------------|---|
|                  | Mean                                                        | Standard dev | n | Mean                                                   | Standard dev | n | Mean                     | Standard dev | n |
| Blood            | 3.745671                                                    | 1.575558     | 4 | 4.210877                                               | 0.947796     | 3 | 4.168174                 | 5.257386     | 5 |
| Heart            | 1.553543                                                    | 0.497039     | 4 | 1.553129                                               | 0.449273     | 3 | 2.450205                 | 1.886517     | 5 |
| Lungs            | 1.733273                                                    | 0.330726     | 4 | 8.829553                                               | 7.099763     | 3 | 18.43101                 | 13.22112     | 5 |
| Stomach          | 0.738245                                                    | 0.169509     | 4 | 0.652772                                               | 0.089637     | 3 | 1.122039                 | 1.126008     | 5 |
| Pancreas         | 1.55159                                                     | 1.294178     | 4 | 0.753637                                               | 0.208766     | 3 | 1.052                    | 1.418785     | 5 |
| Spleen           | 51.02272                                                    | 20.41804     | 4 | 6.502822                                               | 0.58481      | 3 | 19.99855                 | 8.000653     | 5 |
| Small Intestine  | 1.317335                                                    | 0.151532     | 4 | 3.141064                                               | 1.383721     | 3 | 8.659665                 | 1.267427     | 5 |
| Large instestine | 0.885356                                                    | 0.204259     | 4 | 5.846163                                               | 3.318049     | 3 | 1.807485                 | 1.571937     | 5 |
| Liver            | 40.6665                                                     | 4.389445     | 4 | 9.446526                                               | 2.739664     | 3 | 34.83466                 | 22.79337     | 5 |
| Bone             | 2.493422                                                    | 0.739933     | 4 | 1.029953                                               | 0.472213     | 3 | 2.012306                 | 2.351149     | 5 |
| Muscle           | 0.278623                                                    | 0.091204     | 4 | 0.440502                                               | 0.091305     | 3 | 0.711072                 | 0.599797     | 5 |
| Skin and Fur     | 1.516088                                                    | 0.273866     | 4 | 1.497613                                               | 0.349109     | 3 | 2.08836                  | 1.028997     | 5 |
| Tail             | 1.175871                                                    | 0.343965     | 4 | 2.091081                                               | 0.650515     | 3 | 2.623479                 | 1.321404     | 5 |
| Brain            | 0.15547                                                     | 0.139344     | 4 | 0.145119                                               | 0.043302     | 3 | 0.282092                 | 0.291367     | 5 |
| Kidney           | 3.803221                                                    | 0.696908     | 4 | 6.264872                                               | 4.499794     | 3 | 4.423072                 | 2.285061     | 5 |
| Urine            | 4.169576                                                    | 0.508672     | 4 | 461.0004                                               | 366.8738     | 3 | 234.6064                 | 169.7733     | 5 |
| Bladder          | 0.547079                                                    | 0.113357     | 4 | 1.879929                                               | 1.882884     | 3 | 10.82124                 | 11.87311     | 5 |
| Salivary glands  | 0.907305                                                    | 0.60242      | 4 | 0.764007                                               | 0.346333     | 3 | 1.409566                 | 1.042137     | 5 |
| Ovaries          | 0.940056                                                    | 0.653437     | 4 | 0.694487                                               | 0.465829     | 3 | 1.117211                 | 1.065748     | 5 |
| Uterus           | 2.701091                                                    | 1.255419     | 4 | 1.609073                                               | 0.785208     | 3 | 2.448279                 | 3.01738      | 5 |
| Thymus           | 1.507303                                                    | 0.547012     | 4 | 1.010553                                               | 0.090178     | 3 | 1.701703                 | 1.744682     | 5 |
| Tumour           | 10.83139                                                    | 1.93873      | 4 | 1.135511                                               | 0.149272     | 3 | 1.8213                   | 1.113882     | 5 |
| Bile             | 0.346731                                                    | 0.261945     | 3 | 22.38266                                               | 4.51         | 3 | 29.10507                 | 22.56379     | 5 |

### Section 11. Zeta potential measurement of <sup>67</sup>Ga-TCO-PEG-liposomes

| Sample                             | Mean Zeta potential (in mV) | Std. dev    |
|------------------------------------|-----------------------------|-------------|
| PEG liposomes                      | -0.722666667                | 0.338768849 |
| TCO-PEG-liposomes                  | -1.683333333                | 0.217332311 |
| <sup>67</sup> Ga-TCO-PEG-liposomes | -1.507666667                | 0.860497724 |
